# Supplementary material for: Iron ion irradiated Bi2Te3 nanosheets with defects and regulated hydrophilicity to enhance the hydrogen evolution reaction
Source: Royal Society of Chemistry journal article supplement (doi:10.1039/d0nr03256e), 2020-01-01
Supplement: d0nr03256e1.pdf [file d0nr03256e1.pdf]

## **Iron ions irradiated Bi<sub>2</sub>Te<sub>3</sub> nanosheets with defects and regulated hydrophilicity to enhance hydrogen evolution reaction**

Qingtao Wang,<sup>\*a</sup> Kai Cui,<sup>a</sup> Jian Li,<sup>a</sup> Yanxia Wu,<sup>a</sup> Yaoxia Yang,<sup>a</sup> Xiaozhong Zhou,<sup>a</sup>  
Guofu Ma,<sup>a</sup> Zhiwang Yang,<sup>a</sup> Ziqiang Lei,<sup>a</sup> Shufang Ren<sup>\*b</sup>

<sup>a</sup> Key Laboratory of Eco-functional Polymer Materials of the Ministry of Education,  
Key Laboratory of Eco-environmental Polymer Materials of Gansu Province, College  
of Chemistry and Chemical Engineering, Northwest Normal University, Lanzhou  
730070, China E-mail: wangqt@nwnu.edu.cn

<sup>b</sup> Key Laboratory of Evidence Science Research and Application of Gansu Province,  
Gansu University of Political Science and Law, Lanzhou 730070, China E-mail:  
rsf@gsli.edu.cn

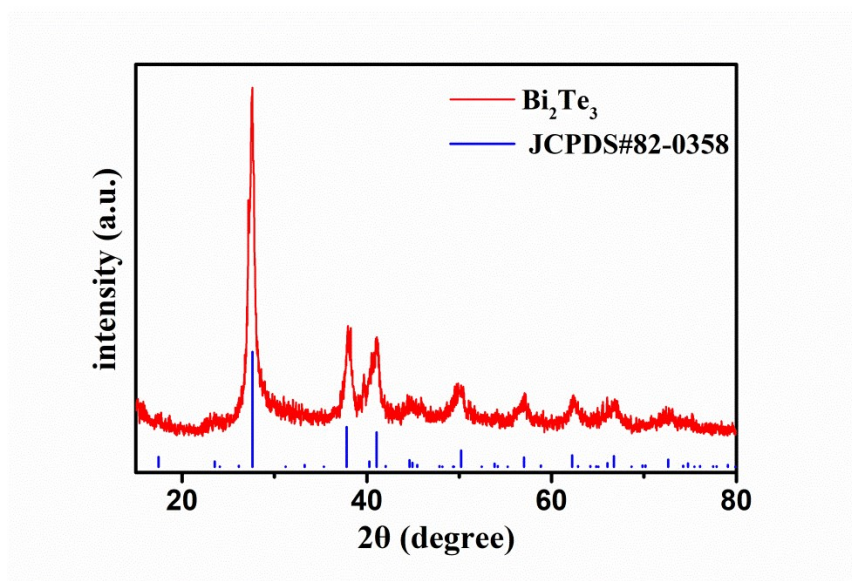

**Fig. S1** XRD pattern of Bi<sub>2</sub>Te<sub>3</sub> nanosheets.

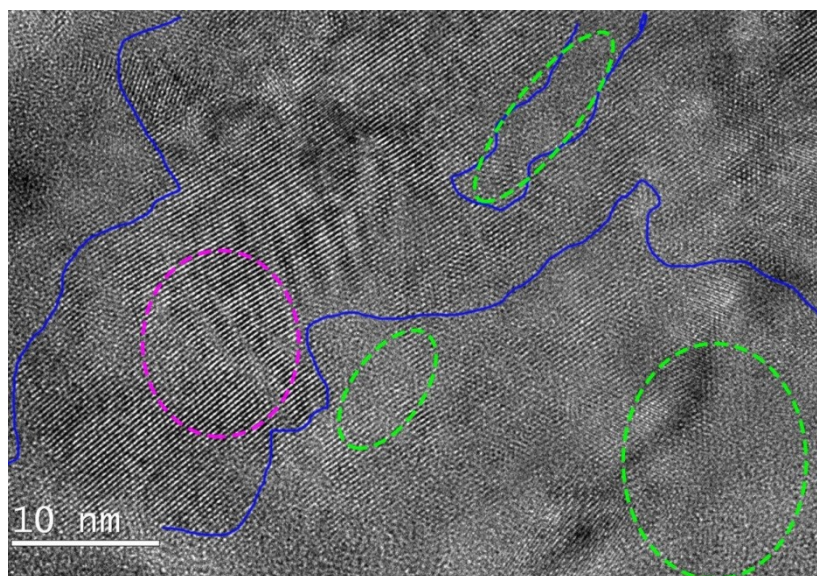

**Fig. S2** HRTEM image of as-prepared Fe-Bi<sub>2</sub>Te<sub>3</sub> nanosheets.

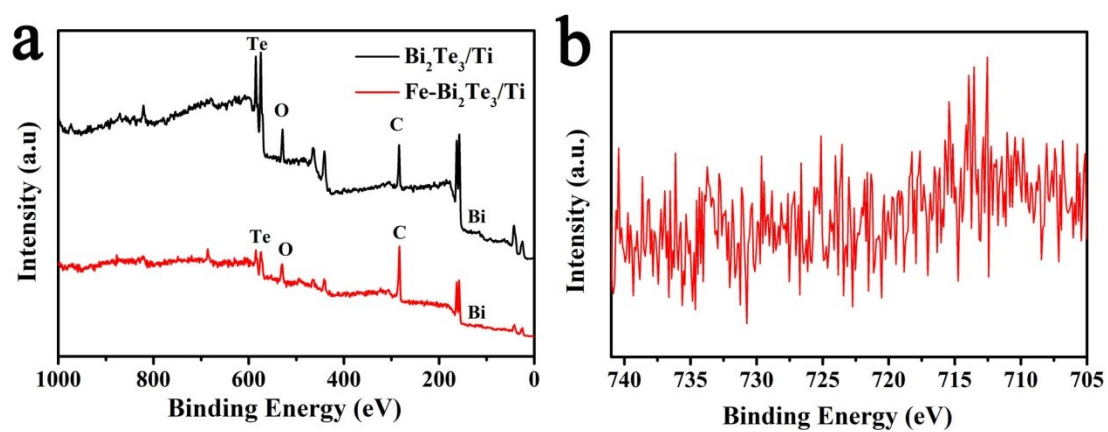

**Fig. S3** (a) XPS spectra of  $\text{Bi}_2\text{Te}_3/\text{Ti}$  and  $\text{Fe-Bi}_2\text{Te}_3/\text{Ti}$ , (b) Fe 2p spectrum of  $\text{Fe-Bi}_2\text{Te}_3/\text{Ti}$ .

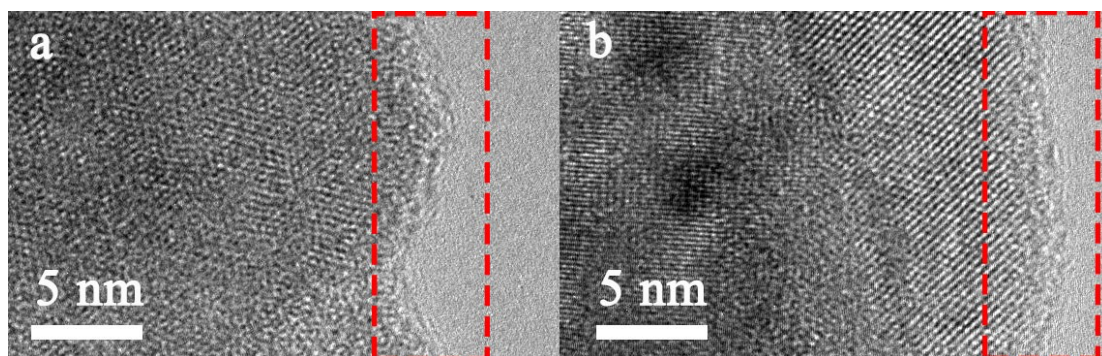

**Fig. S4** (a) and (b) HRTEM images of Fe-Bi<sub>2</sub>Te<sub>3</sub> nanosheets.

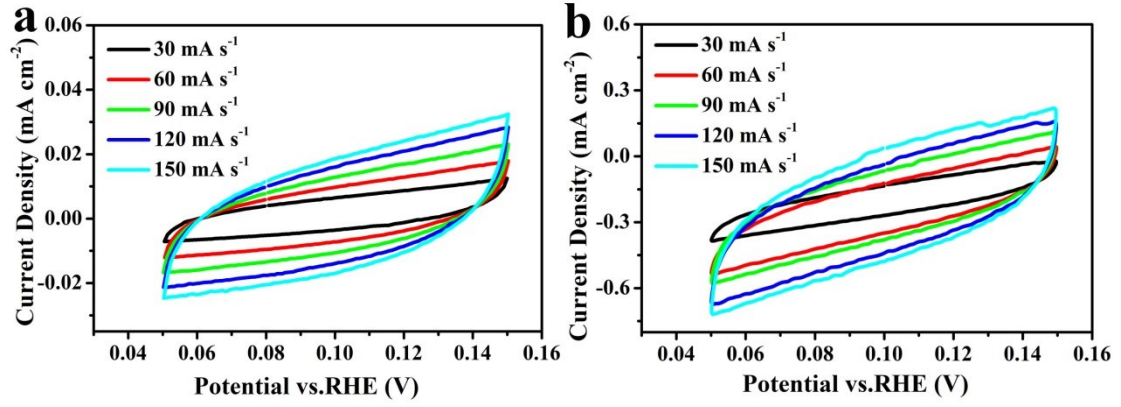

**Fig. S5** The CV measurements of (a) Fe-Bi<sub>2</sub>Te<sub>3</sub>/Ti and (b) Bi<sub>2</sub>Te<sub>3</sub>/Ti in the potential region of 0.05-0.15 V (vs. RHE) in 0.5 M H<sub>2</sub>SO<sub>4</sub>.

The ECSA can be calculated from the  $C_{dl}$  according to:

$$RF = \frac{C_{dl}}{C_s}$$

Where,  $C_s$  is the capacitance of a flat standard electrode with 1 cm<sup>2</sup> of real surface area, which is generally in the range of 20 to 60  $\mu\text{F}\cdot\text{cm}^{-2}$ . The  $C_s$  value used here is 40  $\mu\text{F}\cdot\text{cm}^{-2}$ .

The RF (Roughness Factor) of Fe-Bi<sub>2</sub>Te<sub>3</sub>/Ti:

$$RF = \frac{C_{dl}}{C_s} = \frac{1.26 \text{ mF cm}^{-2}}{40 \mu\text{F cm}^{-2}} = 31.5$$

The RF of Bi<sub>2</sub>Te<sub>3</sub>/Ti:

$$RF = \frac{C_{dl}}{C_s} = \frac{0.11 \text{ mF cm}^{-2}}{40 \mu\text{F cm}^{-2}} = 2.8$$

The ECSA of Fe-Bi<sub>2</sub>Te<sub>3</sub>/Ti, where A is the area:

$$ECSA = RF \times A = 31.5 \text{ cm}^{-2}$$

The ECSA of Bi<sub>2</sub>Te<sub>3</sub>/Ti:

$$ECSA = RF \times A = 2.8 \text{ cm}^{-2}$$

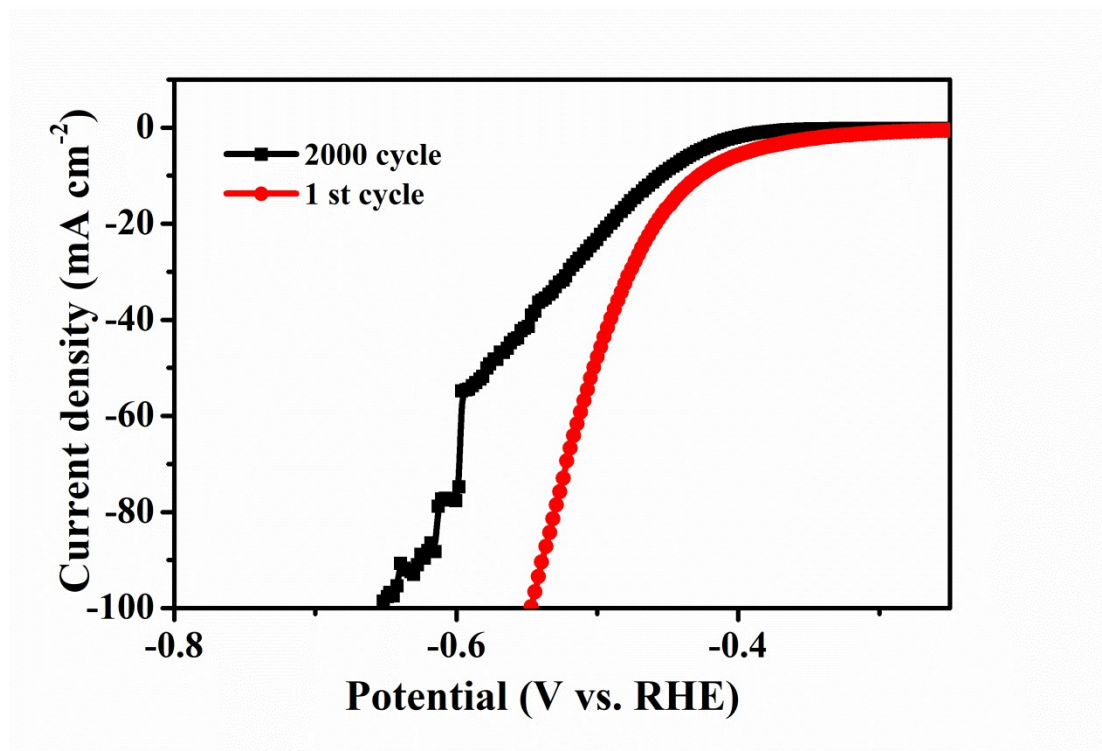

**Fig. S6 (a)** LSV curves of the Bi<sub>2</sub>Te<sub>3</sub>/Ti catalyst before and after 2000 CV cycles.
